# Supplementary material
Source: publisher site journal article supplement (https://www.dovepress.com/article/443153)
Supplement: Supplementary file 1 [file get_supplementary_file.php]

Supplementary Table 1 The equilibrium test of data in the training set and the testing set

|  | | Group | |  | |
| --- | --- | --- | --- | --- | --- |
| Variables | Total (n=954) | Training set (n=667) | Testing set (n=287) | Statistics | *P* |
| Age, years, Mean ± SD | 64.90 ± 11.36 | 64.90 ± 11.31 | 64.89 ± 11.50 | t=0.01 | 0.991 |
| Gender, n (%) |  |  |  | χ2=0.594 | 0.441 |
| Male | 702 (73.58) | 486 (72.86) | 216 (75.26) |  |  |
| Female | 252 (26.42) | 181 (27.14) | 71 (24.74) |  |  |
| History of Diabetes mellitus, n (%) |  |  |  | χ2=0.214 | 0.643 |
| No | 695 (72.85) | 483 (72.41) | 212 (73.87) |  |  |
| Yes | 259 (27.15) | 184 (27.59) | 75 (26.13) |  |  |
| History of hypertension, n (%) |  |  |  | χ2=1.015 | 0.314 |
| No | 379 (39.73) | 258 (38.68) | 121 (42.16) |  |  |
| Yes | 575 (60.27) | 409 (61.32) | 166 (57.84) |  |  |
| History of Hyperlipidemia, n (%) |  |  |  | χ2=0.006 | 0.938 |
| No | 819 (85.85) | 573 (85.91) | 246 (85.71) |  |  |
| Yes | 135 (14.15) | 94 (14.09) | 41 (14.29) |  |  |
| History of stroke or TIA, n (%) |  |  |  | χ2=1.556 | 0.212 |
| No | 898 (94.13) | 632 (94.75) | 266 (92.68) |  |  |
| Yes | 56 (5.87) | 35 (5.25) | 21 (7.32) |  |  |
| PCI or CABG history, n (%) |  |  |  | χ2=0.646 | 0.421 |
| No | 918 (96.23) | 644 (96.55) | 274 (95.47) |  |  |
| Yes | 36 (3.77) | 23 (3.45) | 13 (4.53) |  |  |
| AMI history, n (%) |  |  |  | χ2=0.226 | 0.634 |
| No | 893 (93.61) | 626 (93.85) | 267 (93.03) |  |  |
| Yes | 61 (6.39) | 41 (6.15) | 20 (6.97) |  |  |
| Smoking history, n (%) |  |  |  | χ2=0.190 | 0.910 |
| Non-smoker | 618 (64.78) | 430 (64.47) | 188 (65.51) |  |  |
| Former smoker | 19 (1.99) | 14 (2.10) | 5 (1.74) |  |  |
| Current smoker | 317 (33.23) | 223 (33.43) | 94 (32.75) |  |  |
| History of Aspirin, n (%) |  |  |  | - | 1.000 |
| No | 939 (98.43) | 656 (98.35) | 283 (98.61) |  |  |
| Yes | 15 (1.57) | 11 (1.65) | 4 (1.39) |  |  |
| History of Clopidogrel, n (%) |  |  |  | - | 1.000 |
| No | 950 (99.58) | 664 (99.55) | 286 (99.65) |  |  |
| Yes | 4 (0.42) | 3 (0.45) | 1 (0.35) |  |  |
| History of Ticagrelor, n (%) |  |  |  | - | 0.511 |
| No | 952 (99.79) | 666 (99.85) | 286 (99.65) |  |  |
| Yes | 2 (0.21) | 1 (0.15) | 1 (0.35) |  |  |
| History of Beta-blockers, n (%) |  |  |  | - | 1.000 |
| No | 943 (98.85) | 659 (98.80) | 284 (98.95) |  |  |
| Yes | 11 (1.15) | 8 (1.20) | 3 (1.05) |  |  |
| History of Statins, n (%) |  |  |  | - | 0.571 |
| No | 940 (98.53) | 656 (98.35) | 284 (98.95) |  |  |
| Yes | 14 (1.47) | 11 (1.65) | 3 (1.05) |  |  |
| History of Antihypertensive drugs, n (%) |  |  |  | χ2=0.663 | 0.415 |
| No | 828 (86.79) | 575 (86.21) | 253 (88.15) |  |  |
| Yes | 126 (13.21) | 92 (13.79) | 34 (11.85) |  |  |
| History of Hypoglycemic agents, n (%) |  |  |  | χ2=0.504 | 0.478 |
| No | 883 (92.56) | 620 (92.95) | 263 (91.64) |  |  |
| Yes | 71 (7.44) | 47 (7.05) | 24 (8.36) |  |  |
| Killip classification, n (%) |  |  |  | χ2=6.013 | 0.111 |
| 1 | 601 (63.00) | 421 (63.12) | 180 (62.72) |  |  |
| 2 | 191 (20.02) | 123 (18.44) | 68 (23.69) |  |  |
| 3 | 83 (8.70) | 65 (9.75) | 18 (6.27) |  |  |
| 4 | 79 (8.28) | 58 (8.70) | 21 (7.32) |  |  |
| SBP, mmHg, Mean ± SD | 134.07 ± 25.25 | 134.36 ± 25.61 | 133.38 ± 24.42 | t=0.55 | 0.582 |
| DBP, mmHg, Mean ± SD | 80.71 ± 14.55 | 80.54 ± 14.59 | 81.10 ± 14.48 | t=-0.54 | 0.586 |
| Respiratory rate, beat/min, Mean ± SD | 20.26 ± 1.86 | 20.25 ± 1.88 | 20.29 ± 1.82 | t=-0.31 | 0.759 |
| Temperature, ℃, Mean ± SD | 36.52 ± 0.21 | 36.53 ± 0.22 | 36.52 ± 0.17 | t=0.70 | 0.485 |
| Heart rate, beat/min, Mean ± SD | 78.89 ± 17.47 | 79.27 ± 17.28 | 78.01 ± 17.88 | t=1.03 | 0.304 |
| Alanine aminotransferase, U/L, M (Q1,Q3) | 31.67 (21.00, 50.30) | 32.20 (21.60, 50.20) | 31.00 (20.00, 51.30) | Z=-0.465 | 0.642 |
| Aspartate aminotransferase, U/L, M (Q1,Q3) | 75.65 (38.40, 161.70) | 73.90 (37.50, 164.10) | 79.80 (38.90, 159.80) | Z=0.248 | 0.804 |
| Total bilirubin, μmol/L, M (Q1,Q3) | 14.30 (10.40, 19.00) | 14.30 (10.20, 19.00) | 14.40 (10.40, 19.00) | Z=0.284 | 0.777 |
| Albumin, g/L, Mean ± SD | 39.38 ± 4.08 | 39.47 ± 4.15 | 39.16 ± 3.93 | t=1.08 | 0.281 |
| Urea nitrogen, mmol/L, M (Q1,Q3) | 5.90 (4.69, 7.29) | 5.91 (4.71, 7.35) | 5.87 (4.56, 7.19) | Z=-1.175 | 0.240 |
| Creatinine, μmol/L, M (Q1,Q3) | 96.00 (79.70, 119.00) | 96.80 (79.00, 120.60) | 95.00 (80.70, 114.00) | Z=-0.573 | 0.567 |
| Uric acid, μmol/L, Mean ± SD | 388.21 ± 111.69 | 391.18 ± 113.79 | 381.31 ± 106.51 | t=1.25 | 0.211 |
| Total cholesterol, mmol/L, Mean ± SD | 4.58 ± 1.10 | 4.58 ± 1.10 | 4.56 ± 1.10 | t=0.21 | 0.830 |
| Triglyceride, mmol/L, M (Q1,Q3) | 1.74 (1.19, 2.41) | 1.77 (1.20, 2.43) | 1.71 (1.16, 2.39) | Z=-0.348 | 0.728 |
| Low density lipoprotein, mmol/L, M (Q1,Q3) | 2.40 (1.89, 3.00) | 2.38 (1.85, 3.00) | 2.45 (1.94, 3.00) | Z=0.390 | 0.696 |
| High-density lipoprotein, mmol/L, Mean ± SD | 1.18 ± 0.35 | 1.18 ± 0.35 | 1.19 ± 0.36 | t=-0.41 | 0.681 |
| Blood glucose, mmol/L, M (Q1,Q3) | 7.00 (5.67, 10.14) | 7.00 (5.60, 10.05) | 7.00 (5.70, 10.56) | Z=0.546 | 0.585 |
| Creatine kinase isoenzyme, ng/mL, M (Q1,Q3) | 32.00 (21.00, 66.00) | 30.90 (20.80, 63.50) | 34.00 (22.30, 68.00) | Z=1.872 | 0.061 |
| Hs-cTn I, ng/L, M (Q1,Q3) | 1.11 (0.20, 6.09) | 1.21 (0.21, 6.60) | 0.98 (0.18, 5.67) | Z=-1.034 | 0.301 |
| Electrocardiogram diagnosis, n (%) |  |  |  | χ2=0.396 | 0.529 |
| NSTEMI | 350 (36.69) | 249 (37.33) | 101 (35.19) |  |  |
| STEMI | 604 (63.31) | 418 (62.67) | 186 (64.81) |  |  |
| Left ventricular ejection fraction, Mean ± SD | 58.99 ± 9.93 | 58.90 ± 9.89 | 59.19 ± 10.04 | t=-0.41 | 0.680 |
| Thrombus formation in coronary artery, n (%) |  |  |  | χ2=0.027 | 0.868 |
| No | 549 (57.55) | 385 (57.72) | 164 (57.14) |  |  |
| Yes | 405 (42.45) | 282 (42.28) | 123 (42.86) |  |  |
| TIMI flow grade, n (%) |  |  |  | χ2=5.301 | 0.151 |
| 0 | 519 (54.40) | 356 (53.37) | 163 (56.79) |  |  |
| 1 | 64 (6.71) | 41 (6.15) | 23 (8.01) |  |  |
| 2 | 183 (19.18) | 140 (20.99) | 43 (14.98) |  |  |
| 3 | 188 (19.71) | 130 (19.49) | 58 (20.21) |  |  |
| GRACE, Mean±SD | 147.61 ± 39.99 | 147.82 ± 40.76 | 147.12 ± 38.20 | t=0.25 | 0.805 |
| Time from onset to admission to our hospital, min, M (Q1,Q3) | 239.50 (110.00, 720.00) | 235.00 (113.00, 720.00) | 240.00 (106.00, 720.00) | Z=-0.193 | 0.847 |
| Transferring from other hospital, n (%) |  |  |  | χ2=0.464 | 0.496 |
| No | 712 (74.63) | 502 (75.26) | 210 (73.17) |  |  |
| Yes | 242 (25.37) | 165 (24.74) | 77 (26.83) |  |  |
| Interventions in other hospital, n (%) |  |  |  | χ2=0.016 | 0.899 |
| No | 829 (86.90) | 579 (86.81) | 250 (87.11) |  |  |
| Yes | 125 (13.10) | 88 (13.19) | 37 (12.89) |  |  |
| PCI, n(%) |  |  |  | χ2=0.189 | 0.664 |
| No | 270 (28.30) | 186 (27.89) | 84 (29.27) |  |  |
| Yes | 684 (71.70) | 481 (72.11) | 203 (70.73) |  |  |
| Thrombolytic therapy, n (%) |  |  |  | χ2=1.805 | 0.179 |
| No | 931 (97.59) | 648 (97.15) | 283 (98.61) |  |  |
| Yes | 23 (2.41) | 19 (2.85) | 4 (1.39) |  |  |
| Aspirin use in our hospital, n (%) |  |  |  | χ2=2.762 | 0.097 |
| No | 17 (1.78) | 15 (2.25) | 2 (0.70) |  |  |
| Yes | 937 (98.22) | 652 (97.75) | 285 (99.30) |  |  |
| Clopidogrel use in our hospital, n (%) |  |  |  | χ2=0.109 | 0.741 |
| No | 662 (69.39) | 465 (69.72) | 197 (68.64) |  |  |
| Yes | 292 (30.61) | 202 (30.28) | 90 (31.36) |  |  |
| Ticagrelor use in our hospital, n (%) |  |  |  | χ2=0.010 | 0.921 |
| No | 297 (31.13) | 207 (31.03) | 90 (31.36) |  |  |
| Yes | 657 (68.87) | 460 (68.97) | 197 (68.64) |  |  |
| Tirofiban use in our hospital, n (%) |  |  |  | χ2=0.206 | 0.650 |
| No | 799 (83.75) | 561 (84.11) | 238 (82.93) |  |  |
| Yes | 155 (16.25) | 106 (15.89) | 49 (17.07) |  |  |
| Anticoagulant drugs use in our hospital, n (%) |  |  |  | χ2=0.007 | 0.931 |
| No | 221 (23.17) | 154 (23.09) | 67 (23.34) |  |  |
| Yes | 733 (76.83) | 513 (76.91) | 220 (76.66) |  |  |
| Statins use in our hospital, n (%) |  |  |  | χ2=1.142 | 0.285 |
| No | 40 (4.19) | 31 (4.65) | 9 (3.14) |  |  |
| Yes | 914 (95.81) | 636 (95.35) | 278 (96.86) |  |  |
| Nitrate use in our hospital, n (%) |  |  |  | χ2=0.201 | 0.654 |
| No | 415 (43.50) | 287 (43.03) | 128 (44.60) |  |  |
| Yes | 539 (56.50) | 380 (56.97) | 159 (55.40) |  |  |
| Beta-blockers use in our hospital, n (%) |  |  |  | χ2=0.132 | 0.716 |
| No | 150 (15.72) | 103 (15.44) | 47 (16.38) |  |  |
| Yes | 804 (84.28) | 564 (84.56) | 240 (83.62) |  |  |
| ACEI/ARB use in our hospital, n (%) |  |  |  | χ2=0.248 | 0.619 |
| No | 347 (36.37) | 246 (36.88) | 101 (35.19) |  |  |
| Yes | 607 (63.63) | 421 (63.12) | 186 (64.81) |  |  |
| Outcome, n (%) |  |  |  | χ2=0.005 | 0.943 |
| Non-MACEs | 620 (64.99) | 433 (64.92) | 187 (65.16) |  |  |
| MACEs | 334 (35.01) | 234 (35.08) | 100 (34.84) |  |  |
| NLR, M (Q1,Q3) | 5.04 (3.06, 8.17) | 5.09 (3.04, 8.34) | 4.97 (3.22, 7.80) | Z=-0.127 | 0.899 |
| PLR, M (Q1,Q3) | 138.94 (98.33, 196.34) | 136.26 (96.13, 199.26) | 141.26 (102.89, 191.91) | Z=0.428 | 0.668 |
| SII, M (Q1,Q3) | 996.49 (597.32, 1752.59) | 995.53 (574.39, 1753.67) | 1003.44 (624.00, 1705.53) | Z=0.112 | 0.911 |
|  | | | | | |

**Abbreviations**:MACEs: major adverse cardiovascular events, SD: standard deviation, M: median, Q1:1st quartile, Q3:3st quartile, PCI: percutaneous coronary intervention, CABG:coronary artery bypass graft, AMI: acute myocardial infarction, CAD:coronary artery disease, SBP: systolic blood pressure, DBP: diastolic blood pressure, NLR: neutrophil to lymphocyte ratio, PLR: platelet to lymphocyte ratio, SII: systemic immune-inflammatory index, hs-cTnI: high-sensitivity cardiac troponin I, NSTEMI: non-ST-segment elevation myocardial infarction, STEMI: ST elevation myocardial infarction, TIMI: thrombolysis in myocardial infarction, GRACE: Global Registry of Acute Coronary Events, ACEI:angiotensin converting enzyme inhibitor, ARB:angiotensin receptor antagonist.

Supplementary Table2. Construction of the prediction model for MACEs

| Variables | β | S.E | Wald | *P* | OR (95%CI) | *P* |
| --- | --- | --- | --- | --- | --- | --- |
| SII |  |  |  |  |  |  |
| Killip classification |  |  |  |  |  |  |
| 1 | -3.267 | 0.449 | 52.930 | <0.001 | 0.04 (0.02-0.09) | <0.001 |
| 2 | -1.867 | 0.468 | 15.929 | <0.001 | 0.15 (0.06-0.39) | <0.001 |
| 3 | -0.639 | 0.543 | 1.386 | 0.239 | 0.53 (0.18-1.53) | 0.239 |
| 4 |  |  |  |  | Ref |  |
| Left ventricular ejection fraction | -0.038 | 0.011 | 12.593 | <0.001 | 0.96 (0.94-0.98) | <0.001 |
| Age | 0.026 | 0.010 | 6.484 | 0.011 | 1.03 (1.01-1.05) | 0.011 |
| BUN* | 0.118 | 0.040 | 8.637 | 0.003 | 1.13 (1.04-1.22) | 0.003 |
| Electrocardiogram diagnosis |  |  |  |  |  |  |
| NSTEMI |  |  |  |  | Ref |  |
| STEMI | 0.445 | 0.229 | 3.771 | 0.052 | 1.56 (1.00-2.45) | 0.052 |

**Abbreviations**:MACEs: major adverse cardiovascular events, AMI: acute myocardial infarction, SII: systemic

immune-inflammatory index, Ref: reference, BUN：urea nitrogen，NSTEMI: non-ST-segment elevation myocardial infarction, STEMI: ST elevation myocardial infarction, OR: odds ratio, CI: confidence interval. *BUN：urea nitrogen，normal values range from 1.7 to 8.3mmol/L


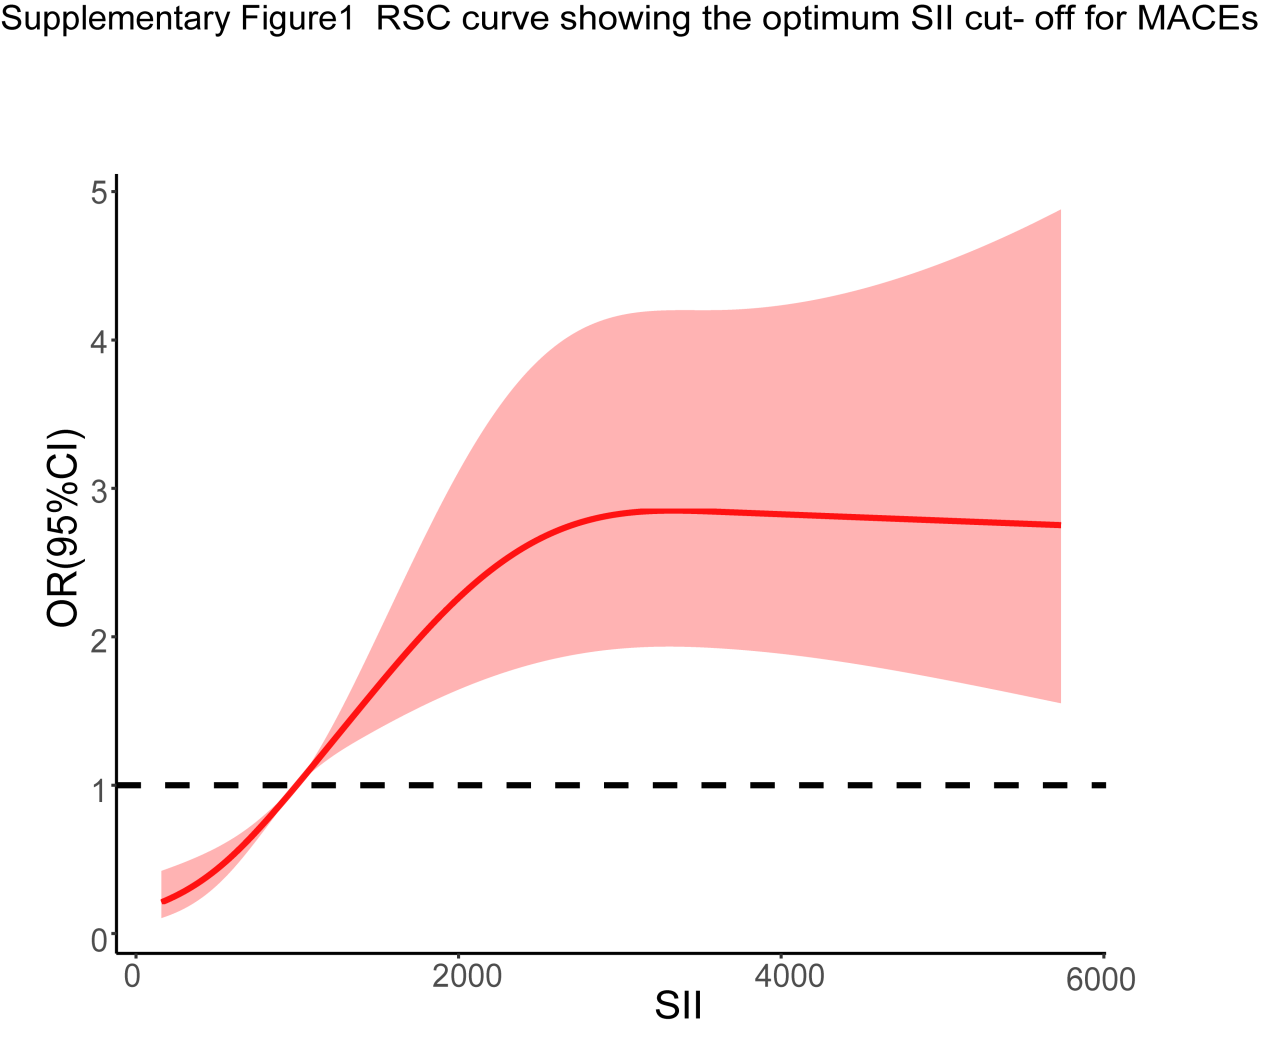


**Supplementary Figure1**:RSC curve showing the optimum SII cut-off for MACEs. RCS: Restricted cubic spline; SII, systemic immune inflammation index; OR: odds ratio; CI: confidence interval.


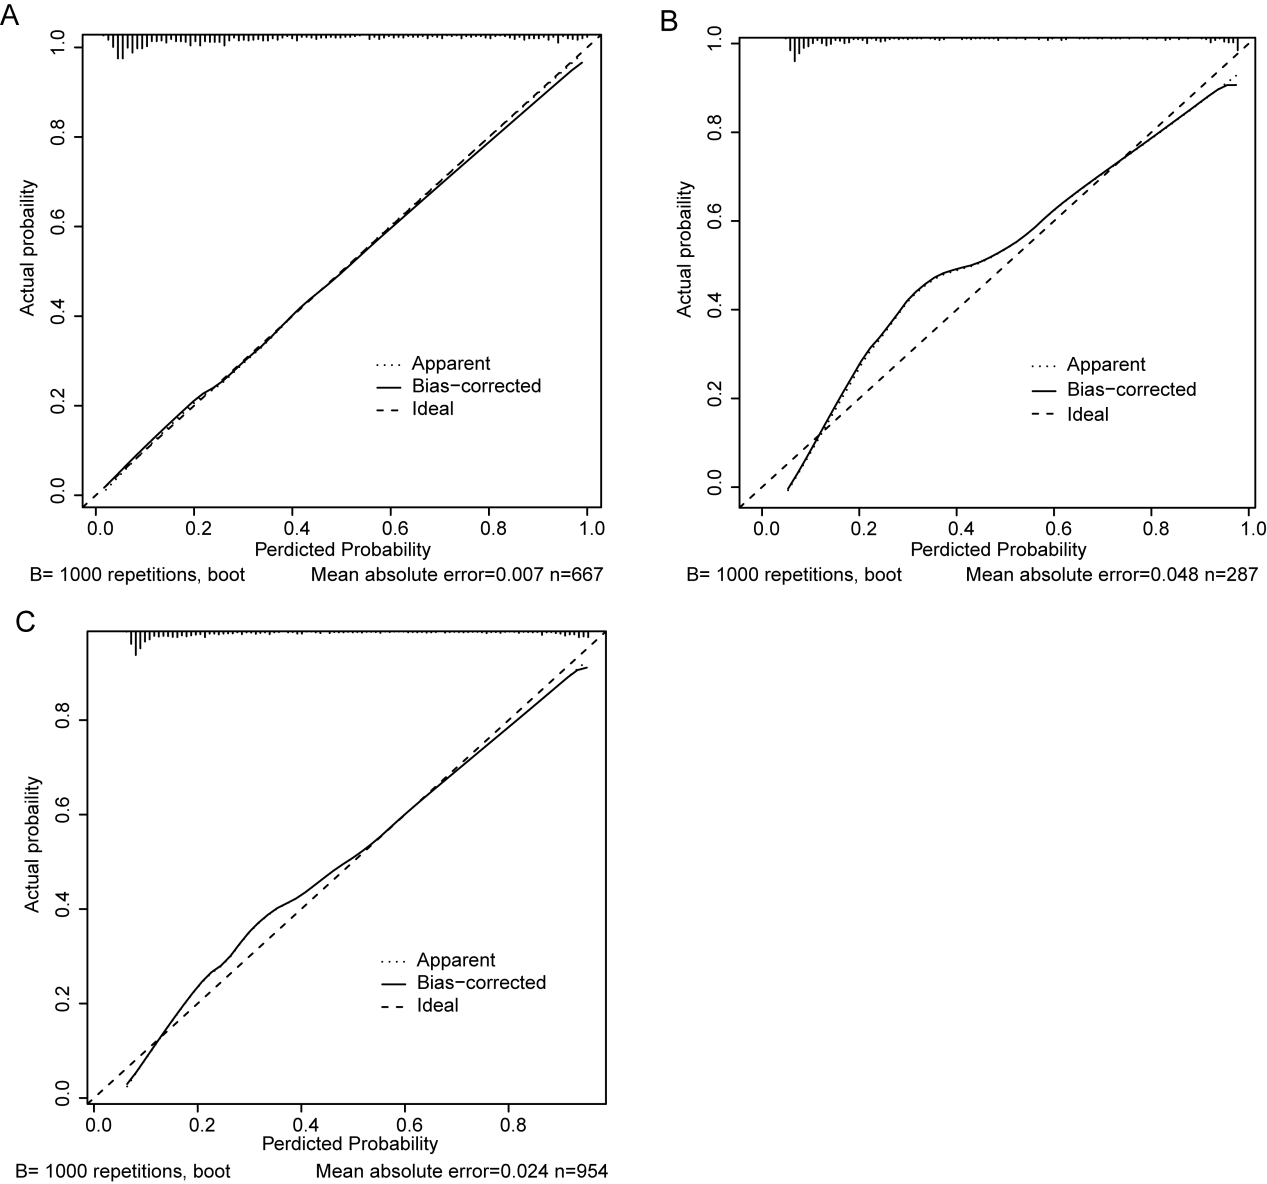


**Supplementary Figure2**: The calibration curves of the SII-based multivariable model. (A) The training set; (B) The testing set;(C)The total set.
